# Supplementary material for: Neural Correlates of Impaired Cognitive Control in Individuals with Methamphetamine Dependence: An fMRI Study
Source: MDPI journal article supplement (doi:10.3390/brainsci13020197), 2023-01-24
Supplement: s1 [file s1]

**Supplementary Table S1.** Maxima of regions showing significantly reduced fMRI signal in individuals with crystal meth dependence compared to healthy controls in the incongruent Stroop task condition (voxel-level  $p < 0.001$  uncorr., cluster size  $> 16$ , according to the expected voxels per cluster)

| Region of Activation    | Left/Right | Brodmann Area | Cluster Size | MNI Coordinates |     |     | t Value | $P_{FWE-corr}$ |
|-------------------------|------------|---------------|--------------|-----------------|-----|-----|---------|----------------|
|                         |            |               |              | x               | y   | z   |         |                |
| Occipital Cortex        | R          | 17            | 3482         | 8               | -73 | 16  | 5.82    | 0.000          |
| Occipital Cortex        | R          | 19            | 163          | 16              | -61 | -7  | 5.03    | 0.047          |
| Superior Temporal Gyrus | R          | 22            | 296          | 54              | -25 | 2   | 4.94    | 0.003          |
| DLPFC                   | L          | 9             | 269          | -27             | 40  | 38  | 4.74    | 0.005          |
| Insula/VLPFC            | R          | 13/44         | 174          | 44              | 4   | 6   | 4.06    | 0.037          |
| Premotor Cortex         | R          | 6             | 120          | 32              | -13 | 54  | 4.70    | 0.132          |
| Parahippocampal Gyrus   | R          | 36            | 23           | 16              | -37 | -15 | 4.53    | 0.962          |
| Occipital Cortex        | L          | 19            | 305          | -43             | -65 | 2   | 4.49    | 0.002          |
| Frontal Eye Field       | R          | 8             | 56           | 18              | 30  | 56  | 4.48    | 0.602          |
| Thalamus                | R          |               | 42           | 12              | -7  | 6   | 4.48    | 0.779          |
| Motor Cortex            | R          | 4             | 41           | 60              | -13 | 46  | 4.45    | 0.792          |
| Medial Temporal Gyrus   | L          | 21            | 58           | -69             | -31 | -13 | 4.41    | 0.578          |
| Fusiform Gyrus          | R          | 37            | 105          | 42              | -35 | -19 | 4.36    | 0.190          |
| Premotor Cortex         | L          | 6             | 63           | -23             | 15  | 52  | 4.35    | 0.519          |
| Supramarginal Gyrus     | L          | 40            | 31           | -45             | -33 | 26  | 4.30    | 0.902          |
| Somatosensory Cortex    | L          | 1             | 99           | -59             | -15 | 32  | 4.29    | 0.220          |
| Supramarginal Gyrus     | L          | 40            | 97           | -49             | -39 | 56  | 4.27    | 0.232          |
| aMCC                    | R          | 24            | 45           | 10              | 4   | 32  | 4.26    | 0.742          |
| Premotor Cortex         | L          | 6             | 22           | -59             | 12  | 40  | 4.15    | 0.968          |
| Superior Temporal Gyrus | L          | 22            | 32           | -47             | -41 | 14  | 4.11    | 0.892          |
| Cerebellum              | L          |               | 137          | -25             | -35 | -47 | 4.10    | 0.087          |
| Premotor Cortex         | L          | 6             | 20           | -35             | -17 | 60  | 4.09    | 0.977          |
| Dorsal PCC              | R          | 31            | 23           | 10              | -37 | 42  | 4.08    | 0.962          |
| DLPFC                   | R          | 9             | 105          | 36              | 50  | 30  | 4.07    | 0.190          |
| Angular Gyrus           | L          | 39            | 92           | -33             | -49 | 34  | 4.06    | 0.262          |
| Hypothalamus            | R          |               | 30           | 2               | -3  | -13 | 4.05    | 0.911          |
| DLPFC                   | R          | 9             | 52           | 38              | 32  | 30  | 4.03    | 0.652          |

|                          |   |    |    |     |     |     |      |       |
|--------------------------|---|----|----|-----|-----|-----|------|-------|
| Fusiform Gyrus           | L | 37 | 29 | -17 | -35 | -25 | 3.96 | 0.920 |
| Insula                   | L | 13 | 37 | -33 | -9  | 12  | 3.96 | 0.839 |
| Frontal Eye Field        | R | 8  | 44 | 40  | 32  | 46  | 3.95 | 0.754 |
| Superior Parietal Lobule | L | 7  | 44 | -33 | -61 | 46  | 3.95 | 0.754 |
| Inferior Temporal Gyrus  | L | 20 | 48 | -47 | -9  | -33 | 3.94 | 0.703 |
| Putamen                  | L |    | 33 | -19 | -5  | -6  | 3.91 | 0.882 |
| Premotor Cortex          | R | 6  | 23 | 44  | -3  | 48  | 3.90 | 0.962 |
| Insula                   | R | 13 | 30 | 30  | -15 | 14  | 3.88 | 0.911 |
| Cerebellum               | L |    | 16 | -15 | -45 | -53 | 3.88 | 0.990 |
| DLPFC                    | L | 46 | 65 | -37 | 36  | 18  | 3.87 | 0.496 |
| Premotor Area            | L | 6  | 36 | -31 | 10  | 64  | 3.87 | 0.850 |
| Angular Gyrus            | R | 39 | 45 | 62  | -45 | 28  | 3.86 | 0.742 |
| RLPFC                    | L | 10 | 30 | -25 | 56  | 18  | 3.76 | 0.911 |
| Superior Parietal Lobule | L | 5  | 40 | -29 | -43 | 56  | 3.76 | 0.804 |
| Premotor Cortex          | L | 6  | 40 | -5  | -19 | 70  | 3.76 | 0.804 |
| Fusiform Gyrus           | L | 37 | 21 | -25 | -29 | -31 | 3.75 | 0.972 |
| Caudate                  | L |    | 28 | -17 | 14  | 8   | 3.75 | 0.928 |
| Frontal Eye Field        | R | 8  | 37 | 2   | 14  | 38  | 3.75 | 0.840 |
| Motor Cortex             | L | 4  | 36 | -59 | -7  | 38  | 3.71 | 0.850 |
| Cerebellum               | R |    | 90 | 24  | -47 | -51 | 3.71 | 0.275 |
| Supramarginal Gyrus      | R | 40 | 16 | 68  | -15 | 28  | 3.70 | 0.990 |
| Thalamus                 | L |    | 33 | -15 | -15 | 12  | 3.68 | 0.882 |
| Superior Parietal Lobule | R | 7  | 72 | 16  | -75 | 50  | 3.64 | 0.423 |
| Superior Parietal Lobule | R | 7  | 37 | 16  | -65 | 50  | 3.60 | 0.839 |
| Supramarginal Gyrus      | R | 40 | 32 | 56  | -29 | 48  | 3.60 | 0.892 |
| DLPFC                    | R | 46 | 19 | 44  | 34  | 8   | 3.52 | 0.981 |
| Superior Parietal Lobule | L | 5  | 18 | -13 | -31 | 48  | 3.50 | 0.984 |

**Abbreviations:** R, right; L, left; DLPFC, Dorsolateral Prefrontal Cortex; RLPFC, Rostrolateral Prefrontal Cortex; PCC, Posterior Cingulate Cortex; aMCC, Anterior Midcingulate Cortex; PCC, Posterior Cingulate Cortex.

**Supplementary Table S2.** Maxima of regions showing significantly reduced fMRI Signal in individuals with crystal meth dependence compared to healthy controls in the congruent Stroop task conditions (voxel-level  $p < 0.001$  uncorr., cluster size  $> 16$ , according to the expected voxels per cluster)

| Region of Activation     | Left/<br>Right | Brodmann Area | Cluster Size | MNI Coordinates |     |     | t Value | $P_{FWE-corr}$ |
|--------------------------|----------------|---------------|--------------|-----------------|-----|-----|---------|----------------|
|                          |                |               |              | x               | y   | z   |         |                |
| Occipital Cortex         | R              | 17            | 1744         | 8               | -73 | 16  | 5.05    | 0.000          |
| Somatosensory Cortex     | R              | 1             | 16           | 60              | -13 | 46  | 4.32    | 0.990          |
| Superior Parietal Lobule | L              | 5             | 65           | -29             | -43 | 56  | 4.25    | 0.496          |
| Superior Temporal Gyrus  | R              | 22            | 146          | 48              | -29 | 2   | 4.24    | 0.071          |
| Medial Temporal Gyrus    | L              | 21            | 25           | -69             | -35 | -13 | 4.04    | 0.950          |
| Ventral PCC              | R              | 23            | 18           | 6               | -17 | 30  | 4.03    | 0.984          |
| Occipital Cortex         | R              | 19            | 98           | 20              | -75 | 30  | 3.96    | 0.226          |
| Occipital Cortex         | L              | 19            | 59           | -47             | -83 | 14  | 3.75    | 0.556          |
| Angular Gyrus            | R              | 39            | 28           | 32              | -57 | 42  | 3.75    | 0.928          |
| Occipital Cortex         | L              | 19            | 82           | -43             | -67 | 2   | 3.74    | 0.334          |
| Superior Parietal Lobule | R              | 7             | 55           | 16              | -77 | 52  | 3.71    | 0.615          |
| DLPFC                    | L              | 9             | 17           | -27             | 38  | 38  | 3.68    | 0.987          |
| Angular Gyrus            | L              | 39            | 44           | -35             | -51 | 34  | 3.65    | 0.754          |
| VLPFC                    | R              | 44            | 21           | 48              | 14  | 16  | 3.53    | 0.972          |
| Angular Gyrus            | L              | 39            | 28           | -31             | -75 | 26  | 3.50    | 0.928          |
| Fusiform Gyrus           | R              | 37            | 20           | 40              | -45 | -27 | 3.49    | 0.977          |

**Abbreviations:** R, right; L, left; PCC, Posterior Cingulate Cortex; DLPFC, Dorsolateral Prefrontal Cortex; VLPFC, Ventrolateral Prefrontal Cortex.

**Supplementary Table S3.** Maxima of regions showing significantly reduced fMRI Signal in individuals with crystal meth dependence compared to healthy controls in both Stroop task conditions together (voxel-level  $p < 0.001$  uncorr., cluster size  $> 16$ , according to the expected voxels per cluster)

| Region of Activation    | Left/Right | Brodmann Area | Cluster Size | MNI Coordinates |     |     | t Value | $P_{FWE-corr}$ |
|-------------------------|------------|---------------|--------------|-----------------|-----|-----|---------|----------------|
|                         |            |               |              | x               | y   | z   |         |                |
| Occipital Cortex        | L          | 17            | 3700         | -8              | -73 | 16  | 5.92    | 0.000          |
| Superior Temporal Gyrus | R          | 22            | 320          | 48              | -27 | 2   | 4.86    | 0.002          |
| Somatosensory Cortex    | R          | 1             | 41           | 60              | -13 | 46  | 4.78    | 0.792          |
| DLPFC                   | L          | 9             | 120          | -27             | 40  | 38  | 4.52    | 0.132          |
| VLPFC                   | R          | 44            | 180          | 50              | 4   | 18  | 3.87    | 0.032          |
| Inferior Temporal Gyrus | L          | 20            | 50           | -43             | -31 | -17 | 4.52    | 0.678          |

|                          |   |    |     |     |     |     |      |       |
|--------------------------|---|----|-----|-----|-----|-----|------|-------|
| Occipital Cortex         | R | 19 | 21  | 16  | -37 | -15 | 4.47 | 0.972 |
| SMA                      | R | 6  | 83  | 32  | -13 | 54  | 4.45 | 0.326 |
| Fusiform Gyrus           | R | 37 | 136 | -35 | -55 | -17 | 4.45 | 0.090 |
| Occipital Cortex         | L | 19 | 375 | -43 | -67 | 2   | 4.44 | 0.001 |
| Medial Temporal Gyrus    | L | 21 | 54  | -69 | -33 | -13 | 4.40 | 0.627 |
| SMA                      | L | 6  | 45  | -23 | -13 | 50  | 4.39 | 0.742 |
| Superior Parietal Lobule | L | 5  | 75  | -29 | -43 | 56  | 4.37 | 0.394 |
| Fusiform                 | R | 37 | 134 | 42  | -35 | -21 | 4.29 | 0.094 |
| Somatosensory Cortex     | L | 1  | 91  | -49 | -39 | 56  | 4.23 | 0.268 |
| Superior Temporal Gyrus  | L | 22 | 35  | -47 | -41 | 14  | 4.18 | 0.861 |
| Ventral PCC              | R | 23 | 22  | 6   | -17 | 30  | 4.14 | 0.968 |
| Angular Gyrus            | L | 39 | 119 | -35 | -49 | 34  | 4.13 | 0.135 |
| Cerebellum               | L |    | 23  | -15 | -45 | -53 | 4.11 | 0.962 |
| Cerebellum               | R |    | 17  | 4   | -35 | -11 | 4.09 | 0.987 |
| Frontal Eye Field        | L | 8  | 56  | -41 | 28  | 48  | 4.08 | 0.602 |
| Cerebellum               | L |    | 34  | -27 | -39 | -49 | 4.07 | 0.872 |
| Cerebellum               | L |    | 89  | -31 | -59 | -53 | 4.03 | 0.282 |
| Angular Gyrus            | R | 39 | 48  | 32  | -57 | 42  | 3.98 | 0.703 |
| Thalamus                 | R |    | 21  | 12  | -7  | 6   | 3.97 | 0.972 |
| DLPFC                    | R | 9  | 39  | 38  | 32  | 32  | 3.97 | 0.816 |
| Motor Cortex             | L | 4  | 46  | -61 | -5  | 38  | 3.91 | 0.729 |
| Superior Parietal Lobule | R | 7  | 120 | 14  | -77 | 52  | 3.89 | 0.123 |
| aMCC                     | R | 32 | 63  | 2   | 14  | 38  | 3.88 | 0.519 |
| Hypothalamus             | R |    | 16  | 2   | -1  | -13 | 3.87 | 0.990 |
| Frontal Eye Field        | R | 8  | 30  | 18  | 30  | 56  | 3.87 | 0.911 |
| DLPFC                    | R | 9  | 54  | 36  | 50  | 30  | 3.85 | 0.627 |
| Cerebellum               | R |    | 68  | 24  | -45 | -53 | 3.85 | 0.464 |
| Premotor Cortex          | R | 6  | 23  | 44  | -5  | 48  | 3.85 | 0.962 |
| Superior Parietal Lobule | L | 7  | 44  | -31 | -61 | 44  | 3.84 | 0.754 |
| Somatosensory Cortex     | L | 1  | 58  | -57 | -17 | 34  | 3.84 | 0.578 |
| Dorsal PCC               | R | 31 | 16  | 10  | -37 | 42  | 3.84 | 0.990 |
| Angular Gyrus            | R | 39 | 65  | 46  | -55 | 28  | 3.81 | 0.496 |
| Angular Gyrus            | R | 39 | 72  | 60  | -45 | 28  | 3.81 | 0.423 |
| Somatosensory Cortex     | R | 1  | 28  | 66  | -15 | 26  | 3.76 | 0.928 |
| DLPFC                    | R | 46 | 29  | 48  | 32  | 10  | 3.76 | 0.920 |

|                          |   |    |    |     |     |    |      |       |
|--------------------------|---|----|----|-----|-----|----|------|-------|
| RLPFC                    | L | 10 | 22 | -39 | 44  | 28 | 3.75 | 0.968 |
| Angular Gyrus            | L | 39 | 56 | -29 | -75 | 26 | 3.71 | 0.602 |
| Superior Parietal Lobule | R | 7  | 24 | 28  | -65 | 32 | 3.70 | 0.956 |
| Fusiform Gyrus           | R | 37 | 38 | 56  | -71 | -1 | 3.68 | 0.828 |
| Frontal Eye Field        | R | 8  | 19 | 20  | 44  | 40 | 3.63 | 0.981 |
| Supramarginal Gyrus      | R | 40 | 28 | 52  | -33 | 54 | 3.62 | 0.928 |
| Superior Parietal Lobule | L | 7  | 25 | -5  | -59 | 46 | 3.56 | 0.950 |
| Occipital Cortex         | R | 19 | 17 | 42  | -69 | 12 | 3.48 | 0.987 |
| Premotor Cortex          | R | 6  | 32 | 2   | 17  | 68 | 3.48 | 0.892 |
| Fusiform Gyrus           | R | 37 | 21 | 56  | -51 | -1 | 3.45 | 0.972 |

**Abbreviations:** R, right; L, left; SMA, Supplementary Motor Area; aMCC, Anterior Midcingulate Cortex; PCC, Posterior Cingulate Cortex; DLPFC, Dorsolateral Prefrontal Cortex; VLPFC, Ventrolateral Prefrontal Cortex; RLPFC, Rostrolateral Prefrontal Cortex

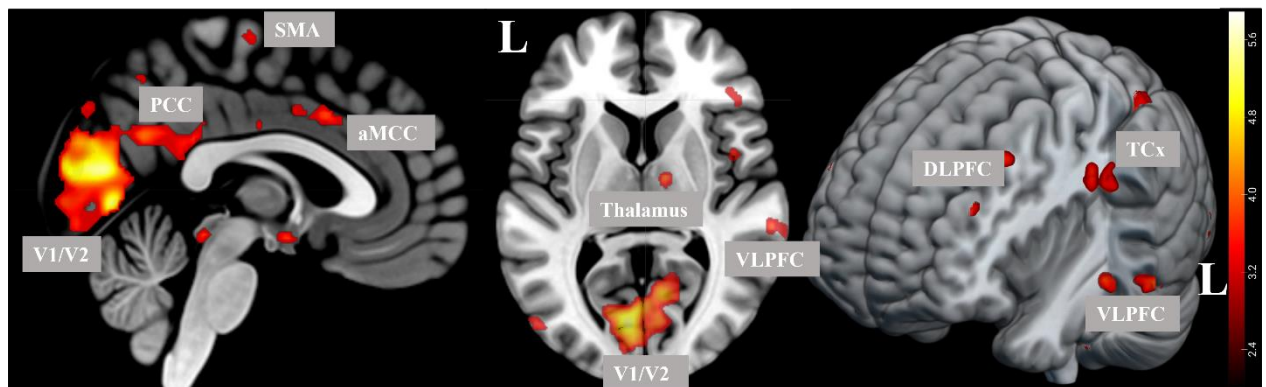

**Supplementary Figure S1.** Significant overall group differences (healthy controls vs. individuals with crystal meth dependence) in brain activation during the Stroop task, both conditions together (voxel-level  $p < 0.001$  uncorr., cluster size  $> 16$ , according to the expected voxels per cluster). Abbreviations: DLPFC, dorsolateral prefrontal cortex; VLPFC, ventrolateral prefrontal cortex; aMCC, anterior midcingulate cortex; V1, primary visual cortex; V2, secondary visual cortex; SMA, supplementary motor area; PCC, posterior cingulate cortex; TCx, temporal cortex
